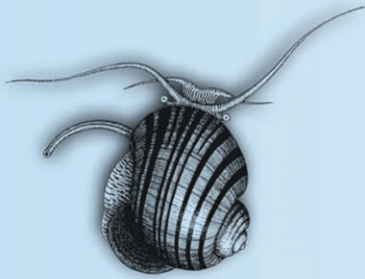

## Mitochondrial and nuclear DNA analyses of *Saccostrea* oysters in Japan highlight the confused taxonomy of the genus

Masashi Sekino<sup>1†</sup> and Hiroyoshi Yamashita<sup>2†</sup>

<sup>1</sup>Research Center for Bioinformatics and Biosciences, National Research Institute of Fisheries Science, Japan Fisheries Research and Education Agency, Fuku-ura, Kanazawa, Yokohama, Kanagawa 2368648, Japan; and

<sup>2</sup>Malaco-diversity Japan, Matsugaoka, Kugenuma, Fujisawa, Kanagawa 2510038, Japan

Correspondence: M. Sekino; e-mail: sekino@affrc.go.jp

(Received 19 January 2016; accepted 22 April 2016)

### ABSTRACT

The systematics of oysters in the genus *Saccostrea* remains unclear, mainly because their taxonomy has been based on their highly variable shell forms. To obtain insights into the taxonomy of this genus, we evaluated the phylogenetic diversity of Japanese *Saccostrea* oysters on the basis of the nucleotide sequences of four mitochondrial genes and the ribosomal first internal transcribed spacer in the nuclear genome. Our specimens ( $N = 226$ ) were divided into seven mitochondrial lineages. However, the nuclear DNA data provided strong evidence of reproductive independence for only three. For most of the lineages, it was difficult to identify a lineage-specific shell feature, thereby preventing us from establishing a decisive link between the observed lineages and morphology-based species names. Given the extreme difficulty in determining the species of *Saccostrea* oysters on the basis of shell morphology, we suggest that the systematics of this genus should be re-established by laying more emphasis on DNA evidence.

### INTRODUCTION

In true oyster species (superfamily Ostreoidea), the taxonomic framework has been established mainly on the basis of their shell morphology and anatomical features (e.g. Stenzel, 1971; Harry, 1985). However, shell form is known to be highly variable depending on life stages as well as habitat characteristics, and is therefore a poor basis for species-level taxonomy (Lam & Morton, 2004, 2006; Reece *et al.*, 2008; Liu *et al.*, 2011; Salvi *et al.*, 2014). This problem is acute in the genus *Saccostrea* Dollfus & Dautzenberg, 1920, in which the shell is highly plastic (Lam & Morton, 2006) and taxonomy very confused.

The supraspecific classification of the true oysters is also controversial. Members of the Ostreoidea have been variously grouped into the two families Gryphaeidae and Ostreidae (e.g. Stenzel, 1971; Harry, 1985; Salvi *et al.*, 2014), into the three Gryphaeidae, Ostreidae and Pycnodonteidae (Inaba & Torigoe, 2004) and into the four Arctostreidae, Flemingostreidae, Gryphaeidae and Ostreidae (Carter *et al.*, 2011). Within Ostreidae, Inaba & Torigoe (2004) defined 11 extant genera, whereas Huber (2010) recognized 18 genera. Of these genera, the major ones are *Crassostrea*, *Dendroostrea*, *Lopha*, *Ostrea*, *Saccostrea* and *Striostrea*, although Inaba & Torigoe (2004) considered *Striostrea* as a synonym of *Saccostrea* (Table 1). The genus *Saccostrea* has been placed in either the subfamily Ostreinae or Crassostreinae, but Salvi *et al.* (2014) erected a new subfamily (Saccostreinae) for *Saccostrea* (Table 1). Raith *et al.* (2015) have recently defined another subfamily (Striostreinae).

The tribe Striostreini was proposed for *Saccostrea*, *Striostrea* and *Striostrea* (*Parastriostrea*) by Harry (1985). In contrast, Carter *et al.* (2011) recognized four tribes including Ostreini, Lophini, Crassostreini and Striostreini (without specifying generic composition of each), of which the last two composed the family Flemingostreidae. However, this classification is not supported by more recent phylogenetic studies in Ostreidae (Salvi *et al.*, 2014; Raith *et al.*, 2015). There is clearly a need for further research into the taxonomic status of the genus *Saccostrea*.

The taxonomy within the genus *Saccostrea* is even more complicated (see Table 2 for list of nominal species with authorities). Harry (1985) claimed that the Indo-West Pacific (IWP) *Saccostrea* oysters belong to a single species, *S. cucullata*. Other authors recognize many nominal *Saccostrea* species in this region, but the identities and synonymies of these species remain unclear (Table 2). The morphology-based diagnoses of *Saccostrea* species have focused on external features such as shell size, pattern of radial ribs and grooves, plication of the valve margin, external lamellae (or squamae), internal chomata (marginal wrinkles), hyote (tubular) spines, adductor muscle scar and area of valve attachment (e.g. Inaba & Torigoe, 2004; Lam & Morton, 2006; Huber, 2010). These shell features are variable and do not necessarily serve for the accurate diagnosis of species. For example, Lam & Morton (2006) showed that shell morphology was capable only of separating *S. mordax* from other IWP *Saccostrea* species (see below). Moreover, even with the recent accumulation of mitochondrial DNA (mtDNA) data (Lam & Morton, 2006; Liu *et al.*, 2011; Sekino & Yamashita, 2013; Hamaguchi *et al.*, 2014), which can be used for DNA barcoding (Hebert *et al.*, 2003), their ambiguous shell morphology has

<sup>†</sup>These authors contributed equally.

**Table 1.** Alternative classifications of six major genera in the family Ostreidae.

| References                        | Family    | Subfamily                           | Tribe         | Genus                                                                         |
|-----------------------------------|-----------|-------------------------------------|---------------|-------------------------------------------------------------------------------|
| Stenzel<br>(1971)                 | Ostreidae | Ostreinae                           | –             | <i>Ostrea</i><br><i>Crassostrea</i><br><i>Saccostrea</i><br><i>Striostrea</i> |
|                                   |           | Lophinae                            | –             | <i>Lopha</i> <sup>‡</sup>                                                     |
| Harry<br>(1985)                   | Ostreidae | Ostreinae                           | Ostreini      | <i>Ostrea</i>                                                                 |
|                                   |           | Crassostreinae                      | Crassostreini | <i>Crassostrea</i><br><i>Saccostrea</i><br><i>Striostrea</i>                  |
|                                   |           | Lophinae                            | Lophini       | <i>Lopha</i><br><i>Dendroostrea</i>                                           |
| Inaba &<br>Torigoe<br>(2004)      | Ostreidae | Ostreinae                           | –             | <i>Ostrea</i><br><i>Crassostrea</i><br><i>Saccostrea</i> <sup>†</sup>         |
|                                   |           | Lophinae                            | –             | <i>Lopha</i><br><i>Dendroostrea</i>                                           |
| Carter<br><i>et al.</i><br>(2011) | Ostreidae | Ostreinae                           | Ostreini      | –                                                                             |
|                                   |           | Lophinae                            | Lophini       | –                                                                             |
|                                   |           | Flemingostreidae                    | Crassostreini | –                                                                             |
| Salvi <i>et al.</i><br>(2014)     | Ostreidae | Ostreinae/<br>Lophinae <sup>‡</sup> | –             | <i>Ostrea</i><br><i>Lopha</i><br><i>Dendroostrea</i>                          |
|                                   |           | Crassostreinae                      | –             | <i>Crassostrea</i>                                                            |
|                                   |           | Saccostreinae                       | –             | <i>Saccostrea</i>                                                             |
|                                   |           | Ostreinae/<br>Lophinae <sup>‡</sup> | –             | <i>Ostrea</i><br><i>Lopha</i><br><i>Dendroostrea</i>                          |
|                                   |           | Crassostreinae                      | –             | <i>Crassostrea</i>                                                            |
| Raith <i>et al.</i><br>(2015)     | Ostreidae | Ostreinae/<br>Lophinae <sup>‡</sup> | –             | <i>Ostrea</i><br><i>Lopha</i><br><i>Dendroostrea</i>                          |
|                                   |           | Crassostreinae                      | –             | <i>Crassostrea</i>                                                            |
|                                   |           | Saccostreinae                       | –             | <i>Saccostrea</i>                                                             |
|                                   |           | Striostreinae                       | –             | <i>Striostrea</i>                                                             |

–, not specified.

<sup>†</sup>Including *Dendroostrea* as a synonym of *Lopha*.<sup>‡</sup>Including *Striostrea* as a synonym of *Saccostrea*.<sup>‡</sup>Salvi *et al.* (2014) and Raith *et al.* (2015) noted that the relationship between Ostreinae and Lophinae needed further study.

hindered the establishment of links between original morphology-based species names and DNA-based monophyletic groups of individuals.

Lam & Morton (2006) classified the IWP *Saccostrea* species using a combination of shell morphology and sequences of the mitochondrial 16S rRNA gene (*16S*). They proposed a ‘superspecies’ of *S. cucullata*, under which nine mitochondrial lineages (not ‘species’) were referred to as follows: lineages A–G of *S. cucullata*, *S. kegaki* and *S. glomerata*. Their data also allowed the unambiguous distinction of the *S. cucullata* superspecies from the *S. mordax* superspecies, which comprises mitochondrial lineages A, B and C (lineage C was reported in subsequent studies; Sekino & Yamashita, 2013). Another *16S*-based study focused on Japanese *Saccostrea* species (Hamaguchi *et al.*, 2014) and revised the lineage definitions, also recognizing *S. mytiloides* and two lineages of *S. malabonensis* (although the authorities of these species names were not specified by Hamaguchi *et al.*, 2014; see Discussion).

During our field surveys to determine the distribution of *Saccostrea* species along the coasts of the southern subtropical islands in Japan (Amami and Ryukyu Islands; Fig. 1), we found individuals that did not conform to the shell forms of the proposed nominal species or those given in previous DNA studies (Lam &

Morton, 2006; Sekino & Yamashita, 2013; Hamaguchi *et al.*, 2014). This finding motivated us to re-evaluate the phylogenetic diversity of the IWP *Saccostrea* species.

In the present study, we investigated the phylogenetic diversity of the so-called *S. cucullata* superspecies (see below for a discussion of the validity of this species name), because the taxonomy is more confused than that of the *S. mordax* superspecies (Lam & Morton, 2006). To that end, we analysed the nucleotide sequences of four mitochondrial genes. Assessing the presence of reproductive isolation between *S. cucullata* lineages was not possible in previous DNA studies (Lam & Morton, 2006; Sekino & Yamashita, 2013; Hamaguchi *et al.*, 2014), because they exclusively examined uniparentally inherited mtDNA. Thus, we also screened the ribosomal first internal transcribed spacer (*ITS1*) in the nuclear genome, which has been used to substantiate the synonymy of two nominal Australian *Saccostrea* species, *S. glomerata* and *S. commercialis* (Anderson & Adlard, 1994).

In the following sections, we avoid using the species name of *S. cucullata*. Many authors have used *S. cucullata* to denote the IWP *Saccostrea* oysters. However, the type locality of *Ostrea cucullata* is the West Indies and Ascension Island in the Atlantic (Born, 1780; Iredale, 1924; Iredale & Roughley, 1933). Consistent with this fact and given the characteristics of the shell of *O. cucullata*, Inaba & Torigoe (2004) and Huber (2010) defined the geographical distribution range of *S. cucullata* s.s. from the West Indies to West Africa and from West Africa to the Arabian Peninsula, respectively. *Saccostrea cucullata* is a large oyster, with a shell height (SH, the maximum shell dimension) ranging from 80 to 140 mm (Arkihpkin *et al.*, 2014). The type specimen has a SH of 127 mm (Inaba & Torigoe, 2004: pl. 6, fig. 4), with acutely angled and raised radial ribs on the left valve, and an internally thickened edge in the left valve. In the Pacific, we have found no *Saccostrea* oyster with these features. Moreover, *S. cucullata* inhabits exposed rocky shores on Ascension Island, its type locality (Arkihpkin *et al.*, 2014), whereas members of the ‘*S. cucullata* superspecies’ (*sensu* Lam & Morton, 2006) favour estuaries and sheltered bays, except for *S. kegaki* (see Results).

Use of *S. cucullata* for *Saccostrea* oysters in the IWP should therefore be discontinued. Instead, we refer to Lam & Morton’s (2006) ‘*S. cucullata*’ superspecies as ‘non-*mordax*’ oysters, because they can be separated from *S. mordax* on the basis of both their mtDNA sequences and their shell morphology (Lam & Morton, 2006).

## MATERIAL AND METHODS

### *Oyster specimens*

We collected *Saccostrea* oysters from four subtropical islands in Japan: Amami-Oshima, Kakeroma, Okinawa and Iriomote Islands (Fig. 1 and Table 3). We also analysed specimens from two temperate areas of Japan including Ehime Prefecture (Shikoku Island) and Wakayama Prefecture (mainland Honshu). For each specimen, we preserved a piece of mantle or adductor muscle tissue in >99% ethanol at below –20 °C for subsequent DNA extraction (Quick Gene-810, Kurabo). We deposited shells of 64 specimens in the Osaka Museum of Natural History (OMNH; Supplementary Material S1A).

In the field, we excluded *S. mordax*-like oysters on the basis of our empirical observations of the shell shapes of *Saccostrea* oysters. In subsequent statistical analyses, we set aside the few individuals of *S. mordax* that contaminated the studied specimens, which were easily identified by *16S*-based DNA barcoding (see below). We also included results from a previous study (Sekino & Yamashita, 2013), in which we determined the sequences of *16S* and the mitochondrial cytochrome *c* oxidase subunit I (*coxI*) genes for specimens from Okinawa Island (sites A-Sa, G-Sa and K-Sa; Fig. 1 and Table 3). These Okinawa specimens were grouped into two of Lam & Morton’s (2006) non-*mordax* lineages: all of the A-Sa

**Table 2.** Summary of nominal *Saccostrea* species.

| Nominal species name                                | Type locality                               | Accepted in literature |                        |
|-----------------------------------------------------|---------------------------------------------|------------------------|------------------------|
|                                                     |                                             | Huber (2010)           | Inaba & Torigoe (2004) |
| 1 <i>S. circumscuta</i> (Gould, 1850)               | Fiji and Samoa Islands                      | Yes                    | Yes                    |
| 2 <i>S. commercialis</i> (Iredale & Roughley, 1933) | New South Wales                             | Syn. of 6              | Yes                    |
| 3 <i>S. cucullata</i> (Born, 1778)                  | West Indies; Ascension Island               | Yes                    | Yes                    |
| 4 <i>S. echinata</i> (Quoy & Gaimard, 1835)         | Amboina (Indonesia)                         | Yes                    | Yes                    |
| 5 <i>S. forskhalii</i> (Gmelin, 1791)               | Red Sea                                     | Syn. of 3              | Yes                    |
| 6 <i>S. glomerata</i> (Gould, 1850)                 | New Zealand                                 | Yes                    | Syn. of 1              |
| 7 <i>S. kegaki</i> (Torigoe & Inaba, 1981)          | Mukaishima (Hiroshima, Setouchi Inland Sea) | Yes                    | Yes                    |
| 8 <i>S. malabonensis</i> (Faustino, 1932)           | Malabon, Rizal, Philippines                 | Yes                    | Yes                    |
| 9 <i>S. margaritacea</i> (Lamarck, 1819)            | American seas? <sup>*</sup>                 | ? <sup>†</sup>         | Yes                    |
| 10 <i>S. mytiloides</i> (Lamarck, 1819)             | Southern ocean of East Indies               | Syn. of 4              | Syn. of 4              |
| 11 <i>S. mordax</i> (Gould, 1850)                   | Fiji Islands                                | Syn. of 15             | Yes                    |
| 12 <sup>‡</sup> <i>S. palmula</i> (Carpenter, 1857) | Mazatlan, Mexico                            | Yes                    | Yes                    |
| 13 <sup>‡</sup> <i>S. prismatica</i> (Gray, 1825)   | Guacomayo, Central America                  | ? <sup>†</sup>         | Yes                    |
| 14 <i>S. pseudangulata</i> (Lamy, 1930)             | Manila (Philippines)                        | ? <sup>†</sup>         | Yes                    |
| 15 <i>S. scyphophilla</i> (Peron & Lesueur, 1807)   | Australia                                   | Yes                    | –                      |
| 16 <i>S. spathulata</i> (Lamarck, 1819)             | Not given                                   | Yes                    | –                      |
| 17 <sup>‡</sup> <i>S. stellata</i> (Gmelin, 1791)   | Guinea                                      | Syn. of 3              | Yes                    |
| 18 <i>S. subtrigona</i> (G. B. Sowerby II, 1871)    | Australia                                   | Yes                    | Syn. of 5              |
| 19 <sup>‡</sup> <i>S. tubulifera</i> (Dall, 1914)   | Gulf of California                          | Yes                    | Yes                    |

<sup>\*</sup>A question mark is added as it is in the original species description.

<sup>†</sup>Huber (2010) tentatively assigned *S. margaritacea* and *S. prismatica* to *Striostrea* and *S. pseudangulata* to *Pustulostrea*.

<sup>‡</sup>These are not considered as IWP *Saccostrea* species.

specimens into lineage C, and those from G-Sa and K-Sa into lineage F (Table 4).

### DNA sequencing

To determine the mitochondrial lineages of our specimens in accordance with the lineage or species names used in previous *16S*-based studies (Lam & Morton, 2006; Hamaguchi *et al.*, 2014), we first screened the *16S* gene for comparison with the *16S* sequences available in the EMBL/DDBJ/GenBank database (ref-seq; for accession numbers, see Supplementary Material S2). Using Primer3 v. 0.4.0 (Untergasser *et al.*, 2012), we designed a novel *16S* primer set for PCR on the basis of the complete *S. mordax* mitogenome (acc. no. FJ841968). The primers (F: 5'-attaagatggcaaaaggaactcg-3'; R: 5'-aaacttctctttcagcagctct-3') are located at the 3'-end region of split *16S* (Milbury & Gaffney, 2005). The protocol for touchdown PCR (Don *et al.*, 1991) was followed, as described by Sekino *et al.* (2015). The basal annealing temperature for touchdown PCR ( $T_{\text{base}}$ ) ranged from 52 to 58 °C depending on the specimens.

We also determined the sequences of three additional mitochondrial genes, *coxI*, cytochrome *c* oxidase subunit III (*coxIII*) and NADH dehydrogenase subunit 3 (*nad3*). For the touchdown PCR amplification of *coxI* and *nad3*, we used previously reported PCR primers (*coxI*: Folmer *et al.*, 1994; *nad3*: Sekino *et al.*, 2012), where  $T_{\text{base}}$  was 48 °C during thermal cycling. By referring to the *S. mordax* mitogenome, we developed a novel *coxIII* primer set, which flanks the whole *coxIII* gene (F: 5'-tgtctccaacaaaaggtatcc-3' within the *tRNA<sup>Gly</sup>* gene; R: 5'-cataatcttcgacatcaacaaagc-3' within the *tRNA<sup>Leu</sup>* gene;  $T_{\text{base}}$ : 52–55 °C).

We conducted enzymatic purification of the PCR products before DNA sequencing (Sekino & Yamashita, 2013). The sequences were determined by reading from both directions using 3730xl DNA Analyzer (Applied Biosystems by Thermo Fisher Scientific) in combination with DNASIS Pro v. 2.02 (Hitachi Software Engineering). All of the four primer sets allowed direct sequencing of the PCR products. For specimens with poor

sequence quality, we re-purified the PCR products using the agarose-gel excision method (MagExtractor, Toyobo).

All of the mtDNA sequences were deposited in the GenBank database (Supplementary Material S1A).

### Nuclear ribosomal ITS1

We followed the method described by Sekino *et al.* (2012) for *ITS1*-PCR amplification, TA cloning of the PCR amplicons and sequencing of the resulting clones. We obtained sequences of at least seven clones per specimen. All singleton clones within specimens were omitted, in order to reduce the risk of including clones with erroneous nucleotide bases. Thus, for each specimen, we defined an *ITS1* type as an identical sequence found in multiple clones (acc. nos in Supplementary Material S1B).

### Multiple sequence alignment

We used MAFFT v. 7.222 (Katoh & Standley, 2013) with the E-INS-i algorithm to align the sequences. We removed ambiguously aligned segments in *16S* and *ITS1* sequences (see below) using Gblocks v. 0.91b (Castresana, 2000), with default settings, except that a gap was defined as a position where  $\geq 50\%$  of sequences exhibited a gap (i.e. 'with half' option for allowed gap positions).

### Classification of mitochondrial lineages

Using MEGA v. 6.06 (Tamura *et al.*, 2013), we summarized the results of *16S*-based DNA barcoding as a neighbour-joining (NJ) tree (Saitou & Nei, 1987) with Kimura's two-parameter (K2P) distance (Kimura, 1980). This approach was consistent with those adopted in previous DNA barcoding of *Saccostrea* oysters (Lam & Morton, 2006; Sekino & Yamashita, 2013; Hamaguchi *et al.*, 2014). Gaps or missing sites were omitted in calculating the genetic distances. We evaluated the confidence of the resulting tree with bootstrap resampling (BS; 1,000 replicates).

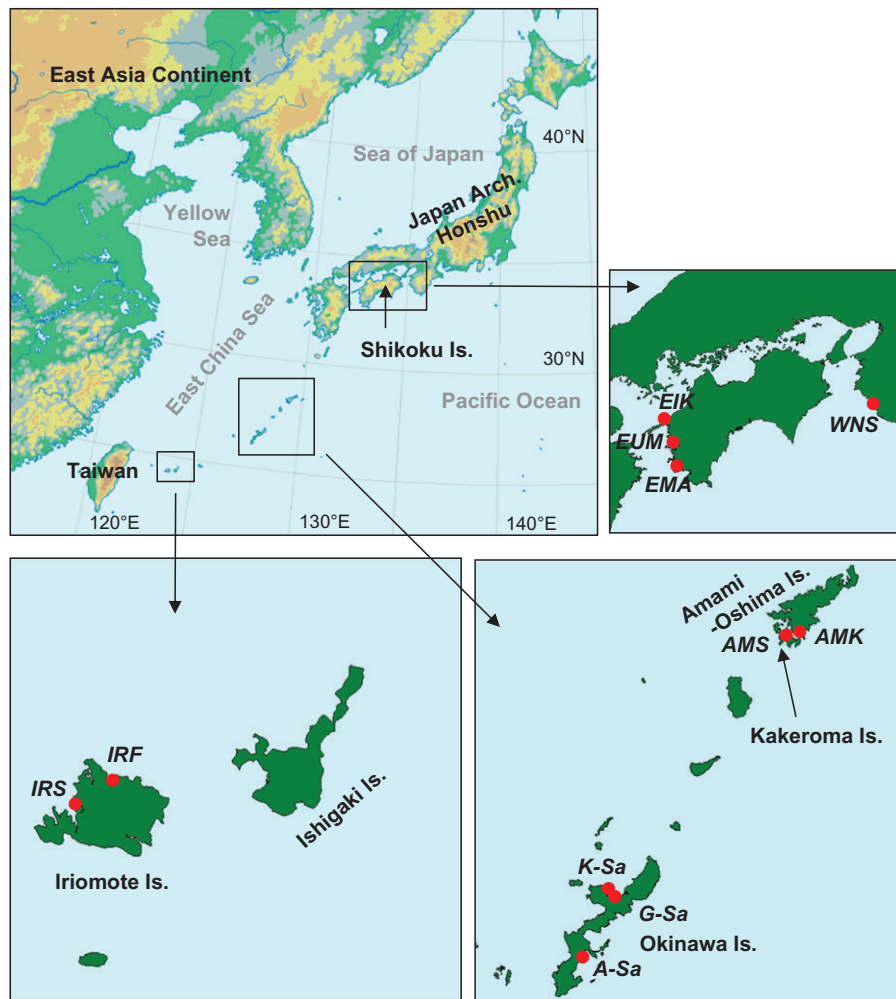

**Figure 1.** Sampling locations.

After the *16S* analysis, we added sequences of *coxI*, *coxIII* and *nad3*, concatenating the four genes for each specimen. First, we evaluated divergence between lineages by estimating the net K2P distance (with MEGA) and the number of net substitutions per site ( $d_A$ ; Nei, 1987) using DnaSP v. 5.10.01 (Librado & Rozas, 2009). Using DnaSP, we also obtained the estimates of nucleotide diversity within lineages ( $\pi$ ; Nei, 1987).

For tree-building, three clustering methods were used, NJ, maximum parsimony (MP) and Bayesian inference (BI). For the MP analysis with MEGA, we selected the subtree pruning and regrafting algorithm with search level 3 (Nei & Kumar, 2000). Branch lengths were estimated on the basis of the average pathway method (Nei & Kumar, 2000). Nucleotide sites with less than 5% alignment gaps or missing sites were allowed for MP calculation. The resulting trees were evaluated with 1,000 BS replicates.

For the BI calculation, we used MrBayes v. 3.2 (Ronquist *et al.*, 2012). First, we searched for the best-fit substitution model for each gene using jModelTest v. 2.1.7 (Darriba *et al.*, 2012). We set the number of substitution schemes to three (24 models) and selected the most appropriate model according to the Bayesian information criterion (Schwarz, 1978). During BI analysis with the gene-specific models, the Markov chain Monte Carlo (MCMC) simulation was run for up to  $10^7$  generations. The resulting trees were saved every 500 generations with an initial burn-in of 5,000 trees (25% of saved trees). We evaluated the convergence of two parallel MCMC runs (four chains per run) on the basis of the standard deviation of split frequencies (below 0.01).

#### Comparison of nuclear *ITS1* among lineages

We compared the sequences of *ITS1* by eye to search for lineage-specific structure. We constructed NJ, MP and BI trees as described above. In addition, we visualized the relationships among *ITS1* types in a median-joining network (Bandelt *et al.*, 1999), constructed using Network v. 5.0.0.0 (Fluxus-engineering; <http://www.fluxus-engineering.com/>).

## RESULTS

#### DNA barcoding using 16 S

We retrieved 21 ref-seqs of *16S* gene from GenBank (Supplementary Material S2), representing all of the non-*mordax* lineages or species proposed in previous studies (Lam & Morton, 2006; Hamaguchi *et al.*, 2014), an unspecified *Saccostrea* oyster, *S. mordax* and *Ostrea denselamellosa* Lischke, 1869. The length of the alignment of the ref-seqs and our 226 specimens was 533 bp, reduced to 470 bp after removal of ambiguous segments (Supplementary Material S3A). Three ref-seqs (Ref-ech2, EF122390; Ref-mal, EF122391; Ref-myt, EF122392) were missing the first 52 and last 121 bp. There were 130 variable sites, among which 55 were singletons.

In the NJ tree, our specimens fell into seven clades (Fig. 2, Table 4), four of which corresponded to non-*mordax* lineages C, F, G and *S. kegaki* (Lam & Morton, 2006). However, the support for relationships among lineages was low.

**Table 3.** Sampling locations of *Saccostrea* specimens.

| Site abbrev. | N  | Island name  | Location                              | Lat./Long.             | Sampling date                |
|--------------|----|--------------|---------------------------------------|------------------------|------------------------------|
| AMS          | 39 | Kakeroma     | Setouchi, Oshima, Kagoshima Pref.     | 28°08'35"N/129°14'53"E | 9 July, 2012                 |
| AMK          | 83 | Amami-Oshima | Setouchi, Oshima, Kagoshima Pref.     | 28°08'20"N/129°20'44"E | 10 July, 2012                |
| A-Sa         | 6  | Okinawa      | Awase, Okinawa, Okinawa Pref.         | 26°18'44"N/127°49'44"E | 26 October, 2011             |
| G-Sa         | 5  |              | Goga, Nago, Okinawa Pref.             | 26°38'07"N/128°00'11"E | 28 October, 2011             |
| K-Sa         | 2  |              | Gabui, Kunigami, Okinawa Pref.        | 26°39'06"N/127°58'60"E | 28 October, 2011             |
| IRF          | 13 | Iriomote     | Taketomi, Yaeyama, Okinawa Pref.      | 24°23'46"N/123°49'16"E | 6 March, 2012                |
| IRS          | 53 |              | Taketomi, Yaeyama, Okinawa Pref.      | 24°21'36"N/123°44'60"E | 28 June, 2012; 28 July, 2015 |
| EIK          | 4  | Shikoku      | Ikata, Nishi-Uwa, Ehime Pref.         | 33°29'35"N/132°18'60"E | 21 May, 2012                 |
| EUM          | 5  |              | Miura, Uwajima, Ehime Pref.           | 33°10'06"N/132°29'36"E | 1 May, 2013                  |
| EMA          | 7  |              | Ainan, Minami-Uwa, Ehime Pref.        | 32°57'48"N/132°33'05"E | 29 April, 2013               |
| WNS          | 9  | Honshu       | Shirahama, Nishi-Muro, Wakayama Pref. | 33°41'41"N/135°20'11"E | 16 October, 2012             |

<sup>†</sup>Mitochondrial sequences previously published by Sekino & Yamashita (2013; see text).

**Table 4.** Observed number of specimens from each non-*mordax* lineage at each location.

| Site abbr. | Island name  | Lineage C | <i>S. kegaki</i> | F  | G  | H  | I  | J | No. of lineages | Total |
|------------|--------------|-----------|------------------|----|----|----|----|---|-----------------|-------|
| AMS        | Kakeroma     | 3         | 32               | 4  | –  | –  | –  | – | 3               | 39    |
| AMK        | Amami-Oshima | 67        | –                | 12 | 4  | –  | –  | – | 3               | 83    |
| A-Sa       | Okinawa      | 6         | –                | –  | –  | –  | –  | – | 1               | 6     |
| G-Sa       |              | –         | –                | 5  | –  | –  | –  | – | 1               | 5     |
| K-Sa       |              | –         | –                | 2  | –  | –  | –  | – | 1               | 2     |
| IRF        | Iriomote     | –         | –                | 3  | –  | –  | 10 | – | 2               | 13    |
| IRS        |              | 6         | 1                | 21 | 7  | 14 | –  | 4 | 6               | 53    |
| EIK        | Shikoku      | –         | 4                | –  | –  | –  | –  | – | 1               | 4     |
| EUM        |              | –         | –                | 5  | –  | –  | –  | – | 1               | 5     |
| EMA        |              | –         | –                | 7  | –  | –  | –  | – | 1               | 7     |
| WNS        | Honshu       | –         | 8                | 1  | –  | –  | –  | – | 2               | 9     |
|            | Total        | 82        | 45               | 60 | 11 | 14 | 10 | 4 |                 | 226   |

The ref-seq of *S. malabonensis* (Ref-mal, EF122391) was nested in the lineage F clade, as reported by Hamaguchi *et al.* (2014). Four individuals from Iriomote Island (IRS) clustered with the ref-seqs of *Saccostrea* sp. (Ref-SacSP, JF915522), *S. echinata* (Ref-ech2, EF122390) and lineage 1 of putative *S. malabonensis* (Ref-IshSac11, AB898233); we refer to this clade as non-*mordax* lineage J. Another ref-seq of *S. echinata* (Ref-ech1, AF463493) had a close relationship with lineages A and B of Lam & Morton (2006). Hamaguchi *et al.* (2014) proposed two lineages of putative *S. malabonensis* (lineages 1 and 2), but we found no specimen that corresponded to lineage 2. The specimens from Iriomote Island included two additional lineages (lineages H and I). Lineage H did not belong to any of the lineages proposed by Lam & Morton (2006) or Hamaguchi *et al.* (2014), and its closest relationship was with *S. kegaki*. Lineage I was grouped with the ref-seqs of *S. mytiloides* (Ref-myt, EF122392; Ref-Iri12, AB898228).

Among the observed lineages, lineage F had the widest spatial distribution (9 of 11 sampling sites), followed by lineage C and *S. kegaki* (4 sites each) (Table 4). All seven lineages were observed at Iriomote Island (IRF and IRS).

#### Trees of four mitochondrial genes

The additional genes *coxI*, *coxIII* and *nad3* were not available for the non-*mordax* lineages represented in GenBank, so we used *S. mordax* and *O. denselamellosa* as ref-seqs, each of which has a completely sequenced mitogenome (Supplementary Material S2).

From the alignments, none of the three genes contained indel polymorphisms, giving constant lengths of 561 bp for partial *coxI*, 765 for partial *coxIII* and 354 for the whole *nad3*. For *16S*, we

repeated multiple alignment and trimming using the dataset with reduced number of species/lineages, which slightly increased the number of available positions to 477 bp (Supplementary Material S3B).

Before phylogenetic reconstruction using the concatenated sequences of the four genes, we examined if the topology of the *16S*-based NJ tree (Fig. 2) was supported by NJ analysis of each of the three protein-coding genes (Supplementary Material S4). The same lineages were retrieved in each case. However, there were several incongruences in the relationships among lineages. For example, lineage G was positioned apart from lineage C in the *16S*- and *nad3* trees, but these two lineages were connected first in the *coxI*- and *coxIII* trees. Another notable discrepancy was the clustering of the *S. mordax* ref-seq within the non-*mordax* clades in the *coxI* tree. As with the *16S* NJ tree, most nodes between lineages were not statistically supported, most likely due to the limited phylogenetic signal from the short DNA segments.

For the BI analysis of the 228 concatenated sequences (2 ref-seqs and 226 specimens), the best-fit model was HKY (Hasegawa *et al.*, 1985) with invariable sites and rate variation among sites ( $\Gamma$ ) for *coxI* and *coxIII*, and HKY with  $\Gamma$  for *16S* and *nad3*.

Overall, the NJ, MP and BI methods gave a congruent tree topology (Fig. 3 shows BI tree; for NJ and MP trees see Supplementary Material S5), although there were many inconsistencies in the clustering patterns within major clades. Seven major clades were retrieved, as in all the single-gene trees. Most of the nodes between lineages were statistically supported by the different clustering methods, providing better resolution of relationships among lineages than the single-gene trees.

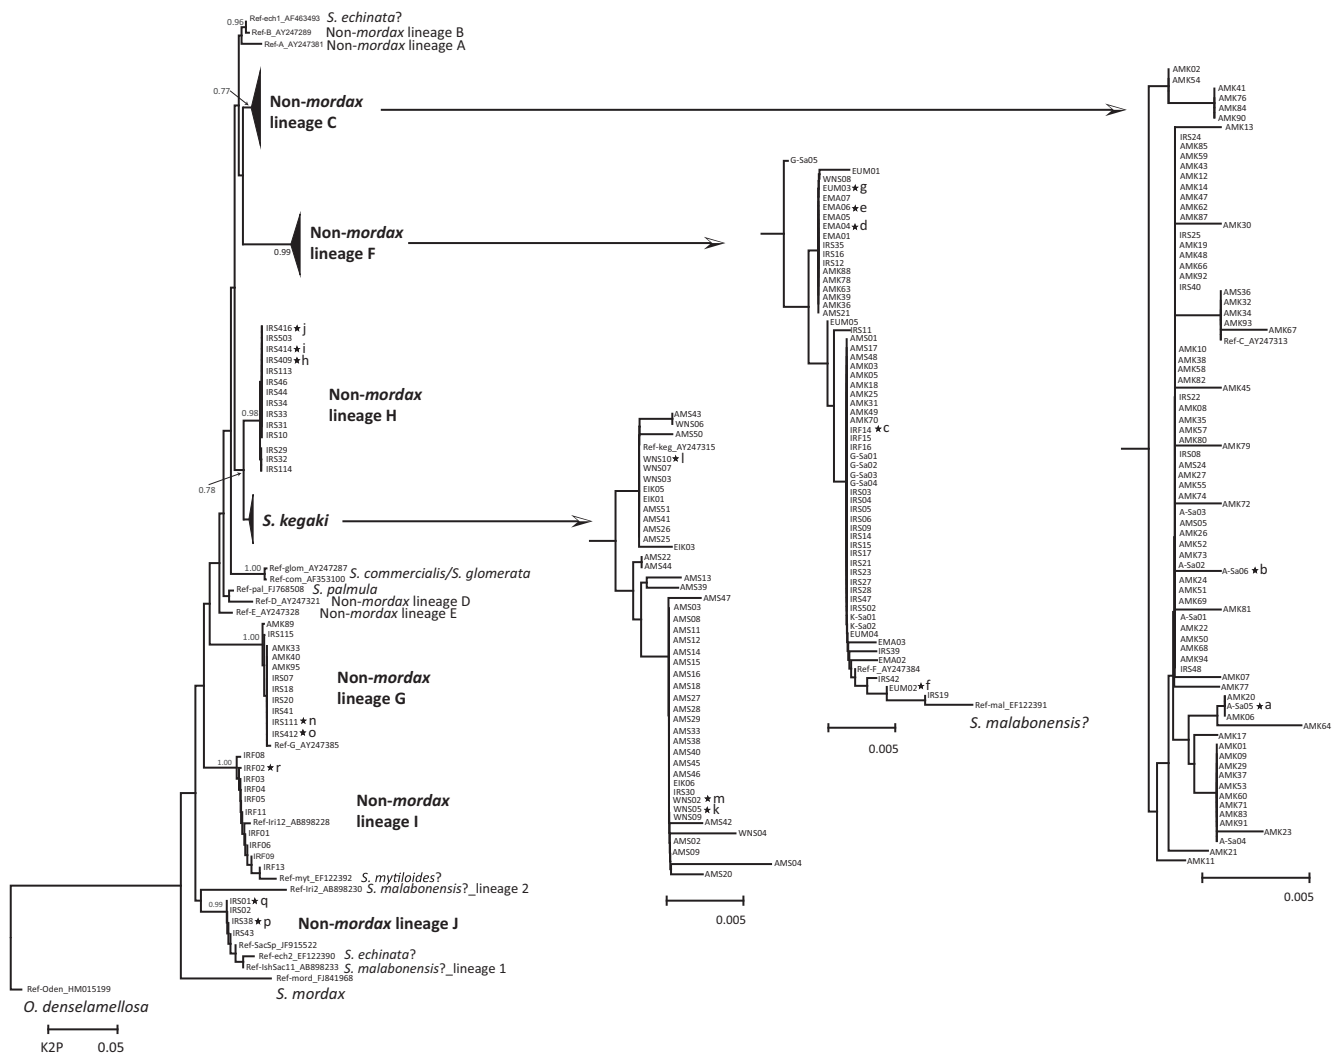

**Figure 2.** Neighbour-joining tree for *Saccostrea* oysters reconstructed using mitochondrial 16S rRNA gene. Bootstrap values ( $\geq 0.70$ ) are given on nodes. For details of the sources of the reference sequences (prefix 'Ref'), see Supplementary Material S2. A reference sequence from *Ostrea densamellosa* was set as outgroup. Shells of 18 specimens are illustrated in Figure 7 (indicated by asterisk and alphabetical identification label as used in Fig. 7).

We estimated pairwise divergences between lineages (Table 5). A combination of lineage H and *S. kegaki* gave the smallest difference (K2P 4.4%;  $d_A$  4.2%). The largest difference was observed between lineages G and J (K2P 19.3%;  $d_A$  16.5%). All lineage combinations except the closest pair yielded a difference of more than 10%.

*Comparison of ITS1 sequences among lineages*

We sequenced 1,138 *ITS1* clones derived from 72 specimens, which covered all of the observed non-mordax lineages (lineage C,  $N = 11$ ; F, 25; G and H each, 8; I, 10; J, 4; *S. kegaki*, 6). The number of sequenced clones per specimen ranged from seven to 27. After the removal of singletons and duplicated clones for each specimen, 136 *ITS1* sequences were retained. Before multiple alignments, the lengths of these sequences, including the last 11 bp of the 18S rRNA gene (at the 5'-end) and the first 30 bp of the 5.8S rRNA gene (3'-end), ranged from 457 to 583. Among the specimens, 21 exhibited no sequence variation, whereas, in the remaining 51, the number of different *ITS1* types per specimen varied between two and four. After the removal of ambiguously aligned segments, the sequence length was 397 including gaps (Fig. 4).

Lineage G was characterized by unique fixed deletions and a fixed substitution (Fig. 4). Lineages I and J both had many fixed

substitutions and deletions. Among the remaining four lineages (C, F, H and *S. kegaki*), we failed to find a lineage-specific character.

In terms of the structure of *ITS1*, a long insertion (84 bp) was observed in one individual each from *S. kegaki* and lineage F (Fig. 5; this block was removed after trimming with Gblocks, so is not included in Fig. 4). The long insertion could be divided into two segments, each homologous to the adjacent upstream segment (Fig. 5: segment A) and downstream segment (segment B). However, the order of the A- and B-homologous segments was inverted in the insertion. According to BLAST search of the GenBank database, this idiosyncratic structure was not exclusive to our specimens; for example, a similar structure occurs in the East Pacific *S. palmula* (acc. no. KF370473).

For the *ITS1* trees (Fig. 6A for BI, Supplementary Material S6 for NJ and MP), the best-fit substitution model, inferred using all the *ITS1* types, was K80 (K2P) with  $\Gamma$ . Consistent with the lineage-specific features of lineages G, I and J, these formed separate clusters, although support for the lineage G clade was low in the NJ and MP trees.

The separation of lineages G, I and J from the other lineages was also shown in the *ITS1* network (Fig. 6B), despite many uncertainties in the topology. None of the *ITS1* types from lineages G, I and J was shared with the other lineages, from which they were

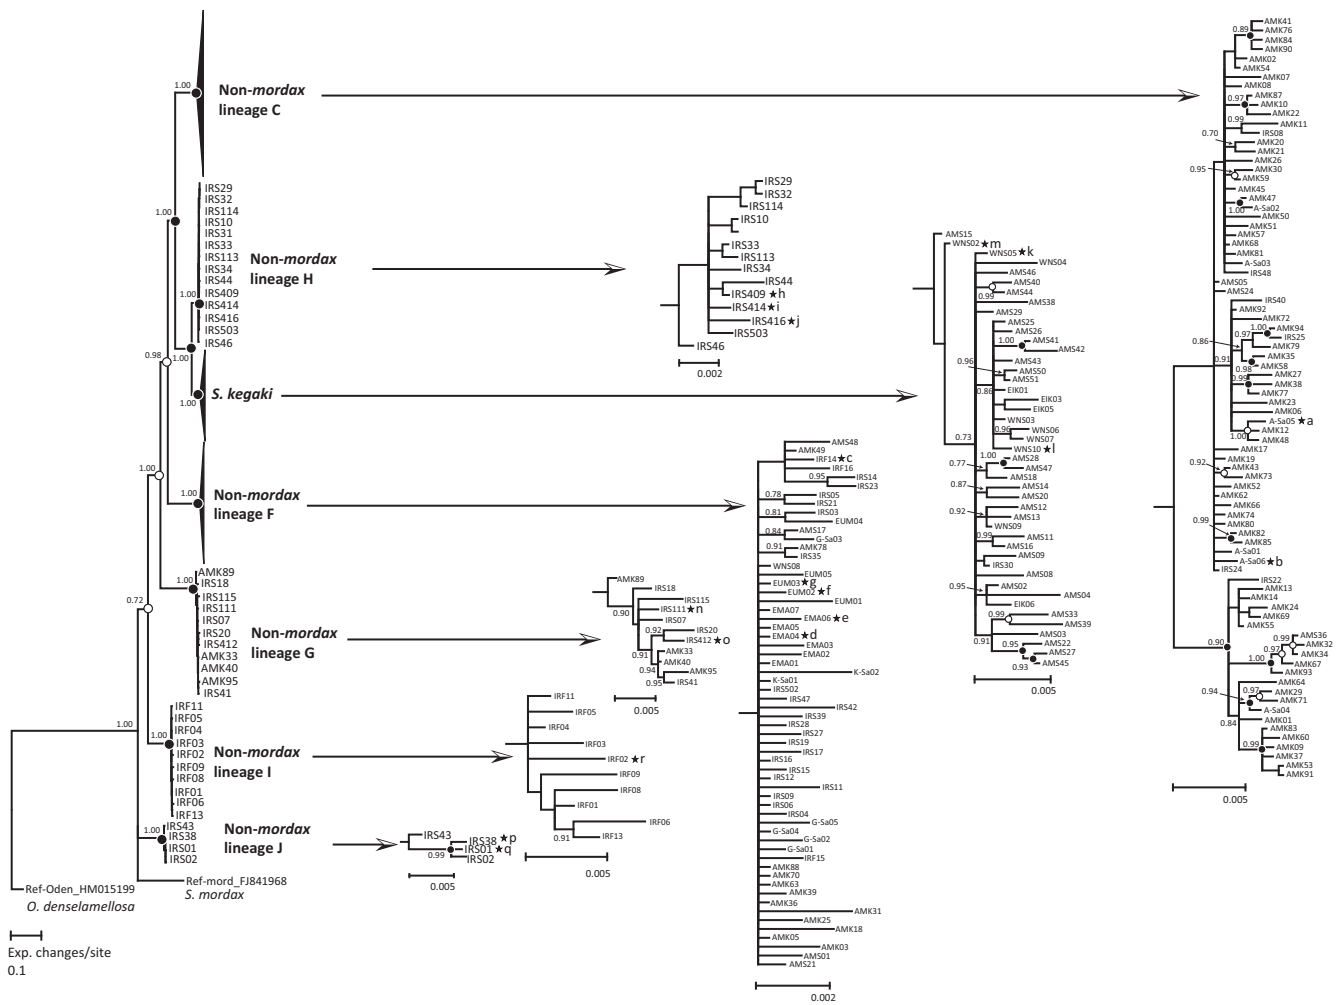

**Figure 3.** Bayesian phylogenetic tree for *Saccostrea* oysters reconstructed using concatenated sequences of mitochondrial *coxI*, *coxIII*, *nad3* and *16S* genes. The lineages were defined according to results of *16S*-based DNA barcoding (Fig. 2). Numbers on nodes are posterior probability values. Solid spots are nodes that were consistently supported by BI, MP and NJ with confidence level  $\geq 0.70$  (see Supplementary Material S5 for NJ and MP trees). Open spots represent nodes that were supported by BI and either MP or NJ. For details of the sources of the reference sequences (prefix ‘Ref’), see Supplementary Material S2. A reference sequence from *Ostrea denselamellosa* was used as outgroup. Shells of 18 specimens are illustrated in Figure 7 (indicated by asterisk and alphabetical identification label as used in Fig. 7).

**Table 5.** Nucleotide divergence between non-*mordax* lineages.

|                  | Lineage C | <i>S. kegaki</i> | Lineage F | Lineage G | Lineage H | Lineage I | Lineage J |
|------------------|-----------|------------------|-----------|-----------|-----------|-----------|-----------|
| Lineage C        | 0.005     | 0.106            | 0.125     | 0.138     | 0.109     | 0.133     | 0.149     |
| <i>S. kegaki</i> | 0.119     | 0.004            | 0.125     | 0.144     | 0.042     | 0.135     | 0.145     |
| Lineage F        | 0.142     | 0.142            | 0.002     | 0.146     | 0.125     | 0.138     | 0.154     |
| Lineage G        | 0.158     | 0.166            | 0.168     | 0.006     | 0.143     | 0.141     | 0.165     |
| Lineage H        | 0.123     | 0.044            | 0.142     | 0.165     | 0.002     | 0.134     | 0.148     |
| Lineage I        | 0.151     | 0.154            | 0.158     | 0.162     | 0.152     | 0.006     | 0.138     |
| Lineage J        | 0.172     | 0.166            | 0.177     | 0.193     | 0.171     | 0.157     | 0.005     |

Below diagonal: net K2P between lineages (Kimura, 1980); on diagonal: nucleotide diversity ( $\pi$ ; Nei, 1987) within lineages; above diagonal: number of net nucleotide substitutions per site between lineages ( $d_A$ ; Nei, 1987).

separated by more than 10 mutational steps. Obviously, the *ITS1* types from lineages C, F, H and *S. kegaki* were not randomly distributed among these lineages, but they were closely related, three of them even being shared by two or three lineages. Given these patterns, we consider that the number of shared *ITS1* types was underestimated owing to the small sample sizes.

*Shell features*

Shell features of the non-*mordax* lineages are summarized in Table 6 and representative shells are shown in Figure 7. The shell form of each lineage was more or less variable, preventing us from defining lineage-specific features in most cases.

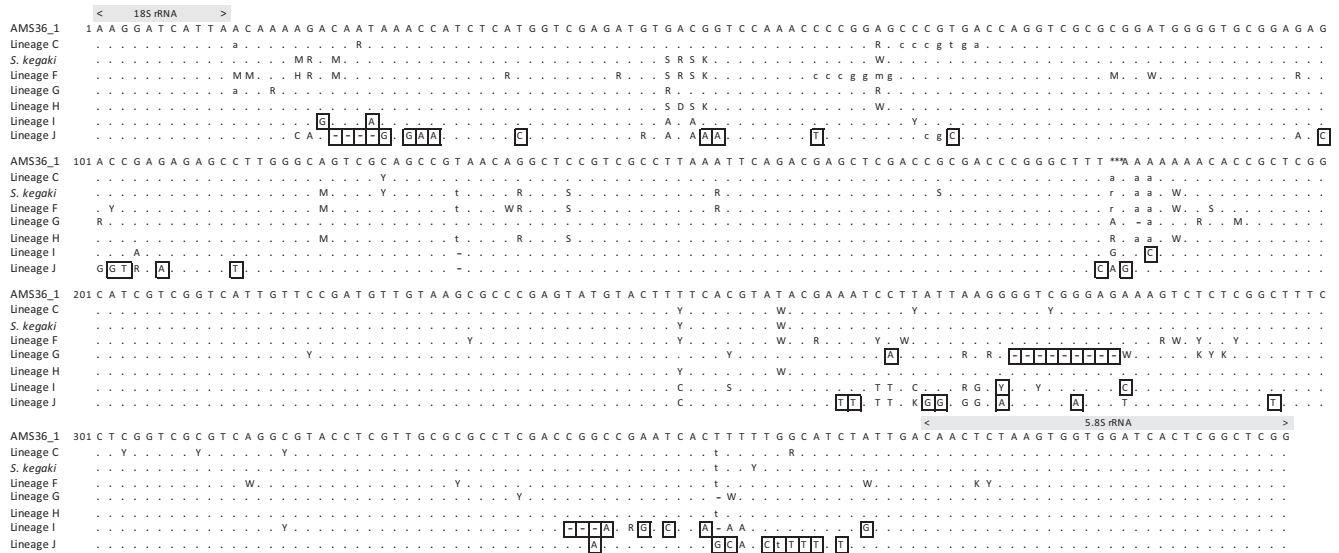

**Figure 4.** Aligned sequences for the nuclear first internal transcribed spacer (*ITS1*) region. Sequence of specimen AMS36, lineage C, is placed at top. Dots indicate nucleotides identical to those in top sequence. Hyphens represent gaps. Ambiguously aligned segments were removed (see text). Site numbers were added after removing ambiguously aligned segments. Substitution polymorphisms within lineages are represented by the IUPAC ambiguity codes (D = A↔G↔T; H = A↔C↔T; K = G↔T; M = A↔C; R = A↔G; S = C↔G; W = A↔T and Y = C↔T). Indel polymorphisms are in lowercase letters. For each of lineages G, I and J, the lineage-specific features are enclosed within solid lines.

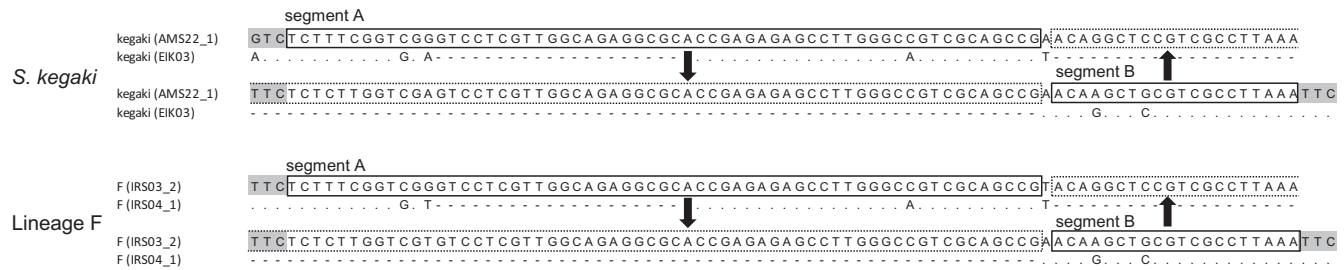

**Figure 5.** The sequence structure of the long insertion observed in *ITS1*. A long insertion (84 bp) was found commonly in *S. kegaki* (AMS22) and lineage F (IRS03). For each lineage, the sequence from another specimen was aligned (*S. kegaki*, EIK03; lineage F, IRS04). Dots indicate nucleotide identity. Hyphens represent gaps. The insertion is enclosed within dotted lines. This long insertion comprised two segments: one homologous to the adjacent upstream segment (segment A), the other homologous to the downstream segment (segment B) (enclosed within solid line), but in the inverse order in the insertion (indicated by bold arrows). Grey-shaded nucleotides in insertion (TTC) were homologous to the three nucleotides both before segment A (GTC) and after segment B (TTC).

Overall, the shell sizes were small to medium (SH < 80 mm; Table 6), except for lineage J (SH to 123 mm; Fig. 7: p1, p2). Lineages G, H and *S. kegaki* had a relatively narrow shell (width ≤ 18 mm), with a weakly upturned margin of the left valve (Fig. 7: k). In many lineages, the anterior part of the left valve was frequently raised; this pattern contrasts with that of *S. mordax*, where the raised left valve margin is more conspicuous posteriorly (Inaba & Torigoe, 2004). Without exception, hyote spines were observed in *S. kegaki* (Fig. 7: k, l1, l2, m; Table 6). A few specimens of lineage F, as well as small specimens of lineage H, also had hyote spines (Fig. 7: j1). Lineages C and F had particularly well-developed ribs on the left valve. The edge of the left valve margin was smooth, wavy or saw-like in the non-*mordax* lineages (Table 6). In contrast to *S. mordax*, radial ribs and grooves on the right valve were absent. The protrusion of the ligamental area was not extensive compared with *S. mordax* and *Crassostrea* species. All of the non-*mordax* lineages possessed chomata, the strength and continuity of which varied within lineages. Harry (1985) and Hamaguchi *et al.* (2014) reported a few *Saccostrea* specimens with no chomata, but this appears to be rare. The adductor muscle scar exhibited continuous variation among reniform, D-shaped and oval forms, and was more

deeply coloured in the right valve. Some specimens exhibited a conspicuous quenstedt muscle insertion (Fig. 7: o2). The disjunct pallial lines were remarkable in lineages C (Fig. 7: a2) and G. Chalk deposits were found in all lineages, but the degree of development was not lineage-specific. Squamae or lamellae were observed on the outer surface of the right valve in most specimens, but these were often removed by erosion except at the shell margin, or remained only as commarginal threads (Table 6). Lineages F, I and J had well-developed squamae. Lineages H, J and *S. kegaki* formed calcareous lamellae (Fig. 7: p1). The inner shell colour was essentially white, but the interior of the right valve was occasionally silver or silver-grey (Fig. 7: o2). The internal margin of the left valve was often stained black or lilac (Fig. 7: n2, p2). Yellowish green, ochre or black spots or layers were sometimes present on the inner surfaces. The internal edges of the lamellae in the right valve were usually a mixture of ochre and black (Fig. 7: d2, h2, j2, q).

*Habitat*

According to the present and previous studies (Lam & Morton 2006; Hamaguchi *et al.*, 2014), the non-*mordax* lineages are



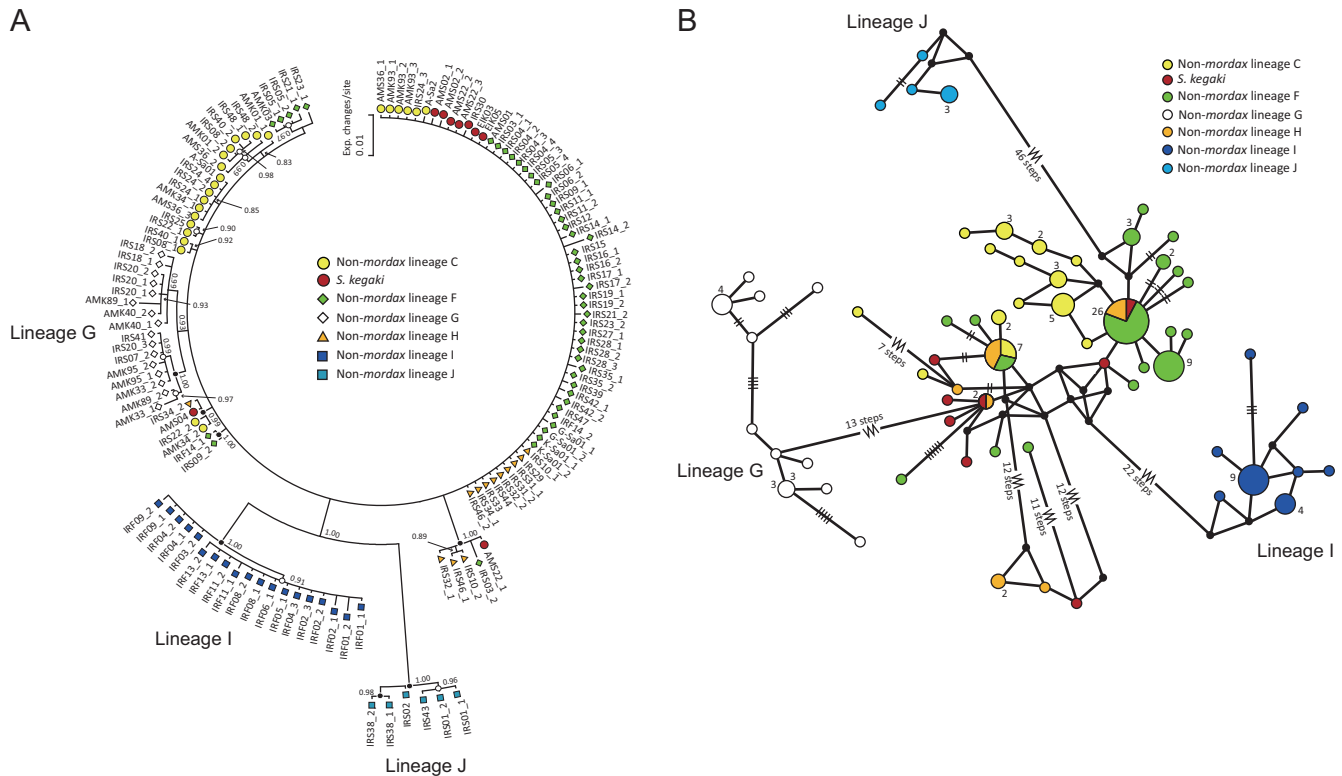

**Figure 6.** **A.** Bayesian phylogenetic tree reconstructed using *ITS1* sequences. The majority of specimens (51 of 72) had multiple *ITS1* types (indicated by underscore plus number after each specimen ID). Lineages defined according to results of *16S*-based DNA barcoding. Numbers on nodes are posterior probability values. Solid spots are nodes that were consistently supported by BI, MP and NJ with confidence levels  $\geq 0.70$ . Open spots are nodes supported by BI and either NJ or MP. The NJ and MP trees are provided in Supplementary Material S6. **B.** Median-joining network among observed *ITS1* types. Circles represent *ITS1* steps. Lineages are distinguished by different colours. The frequency of each type is shown numerically, except for singletons. The numbers of mutational steps between *ITS1* types are shown as bars or (if more than 6) as figures; branches with no bar represent a single mutational step. Black dots are median vectors.

**Table 6.** Shell characteristics of each non-*mordax* lineage.

|                  | Left valve |                      |                      |                   |                   |                             | Right valve              |                              |                           |
|------------------|------------|----------------------|----------------------|-------------------|-------------------|-----------------------------|--------------------------|------------------------------|---------------------------|
|                  | Size       | SH <sup>†</sup> (mm) | SW <sup>†</sup> (mm) | area <sup>‡</sup> | Ribs <sup>§</sup> | Rib form                    | Shell-margin form        | Growth lamellae              | Hyote spines <sup>¶</sup> |
| Lineage C        | M          | 60                   | 28                   | >50%              | ±                 | Rounded or moderately sharp | Smooth or saw-like       | Thread-like                  | –                         |
| <i>S. kegaki</i> | M          | 68                   | 17                   | >70%              | ±                 | Rounded or sharp            | Smooth, wavy or saw-like | Undeveloped                  | +                         |
| Lineage F        | S, M       | 59                   | 27                   | >10%              | ±                 | Rounded or sharp            | Smooth, wavy or saw-like | Thread-like or small squamae | ± <sup>¶</sup>            |
| Lineage G        | M          | 56                   | 18                   | >70%              | ±                 | Rounded                     | Smooth, wavy or saw-like | Thread-like or small squamae | –                         |
| Lineage H        | M          | 64                   | 14                   | >70%              | –                 | No ribs                     | Smooth, wavy or saw-like | Undeveloped or small squamae | ±                         |
| Lineage I        | M          | 77                   | 26                   | >50%              | ±                 | Rounded                     | Smooth or wavy           | Well developed               | –                         |
| Lineage J        | M, L       | 123                  | 59                   | >10%              | ±                 | Rounded                     | Smooth or wavy           | Well developed               | –                         |

<sup>†</sup>According to SH of adults: S, <30 mm; M, ≤80 mm; L, >80 mm.

<sup>†</sup>SH, maximum shell height; SW, maximum shell width.

<sup>‡</sup>Attachment area as proportion of whole outer surface of left valve.

<sup>§</sup>–, invariably absent; +, invariably present; ±, absent or present.

<sup>¶</sup>Only one specimen exhibited hyote spines.

distributed mainly in tropical and subtropical zones (Table 7). *Saccostrea kegaki* is the northernmost lineage and inhabits temperate coasts. As noted by Lam & Morton (2006), our specimens were found in estuarine or sheltered environments, with the exception of

*S. kegaki*, which occurred on open and exposed shores. Most specimens were found attached to rocks at mid and low tide, but lineage I was found exclusively on the trunks or roots of mangrove trees in the mid-tidal zone (Table 7).

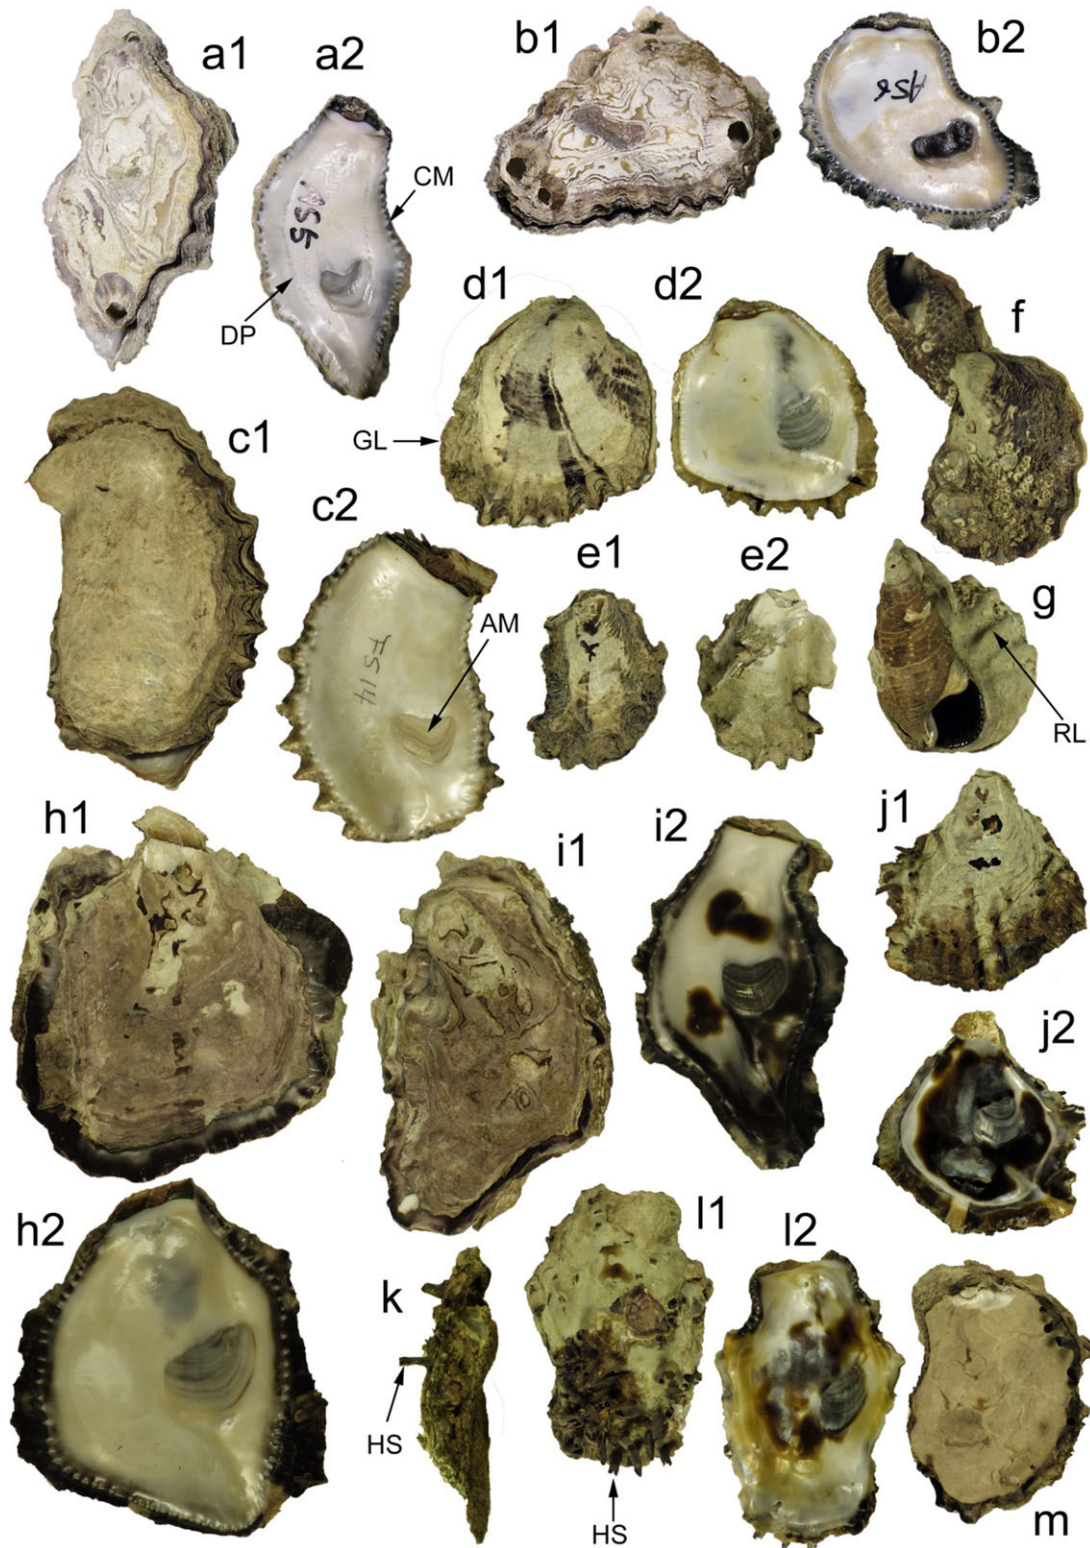

**Figure 7.** Shells of non-mordax lineages of *Saccostrea* oysters. Each specimen, often shown in two views, is indicated by a unique letter and Osaka Museum of Natural History (OMNH) registration number. Lineage C (a1–b2): a, OMNH-Mo 38402, A-Sa (a1, BV, SH 57 mm; a2, IRV); b, OMNH-Mo 38403, A-Sa (b1, BV, SH 45 mm; b2, IRV); lineage F (c1–g): c, OMNH-Mo 38431, IRF (c1, BV, SH 60 mm; c2, IRV); d, OMNH-Mo 38472, EMA (d1, BV, SH 41 mm; d2, IRV); e, OMNH-Mo 38474, EMA (e1, BV, SH 33 mm; e2, OLV); f (OMNH-Mo 38465, EUM, BV, SH 30 mm) and g (OMNH-Mo 38466, EUM, OLV, SH 27 mm), which were attached to living *Batillaria multiformis*; lineage H (h1–j): h, OMNH-Mo 38507, IRS (h1, BV, SH 61 mm; h2, IRV); i, OMNH-Mo 38512, IRS (i1, BV, SH 60 mm; i2, IRV); j, OMNH-Mo 38514, IRS (j1, ORV, SH 43 mm; j2, IRV); *S. kegaki* (k–m): k, OMNH-Mo 38458, WNS (anterior side of BV, SH 43 mm); l, OMNH-Mo 38463, WNS (l1, ORV, SH 52 mm; l2, IRV); m, OMNH-Mo 38455, WNS (BV, SH 38 mm); lineage G (n1–o2): n, OMNH-Mo 38481, IRS (n1, BV, SH 53 mm; n2, ILV); o, OMNH-Mo 38510, IRS (o1, BV, SH 56 mm; o2, IRV); lineage J (*S. spathulata*; p1–q): p, OMNH-Mo 38436, IRS (p1, ORV; p2, ILV, SH 123 mm); q, OMNH-Mo 38434, IRS (IRV, SH 107 mm); lineage I: r, OMNH-Mo 38419, IRF (BV, SH 50 mm). Abbreviations on figure: AM, adductor muscle scar; CM, chomata; DP, disjunct pallial line; GL, growth lamella; HS, hyote spine; LA, ligamental area; QM, quenstedt muscle insertion; RL, radial rib of the left valve; UC, umbonal cavity. Abbreviations in caption above: BV, both valves; ILV, interior left valve; IRV, interior right valve; OLV, outer left valve; ORV, outer right valve. Sampling sites abbreviated as in Table 3.

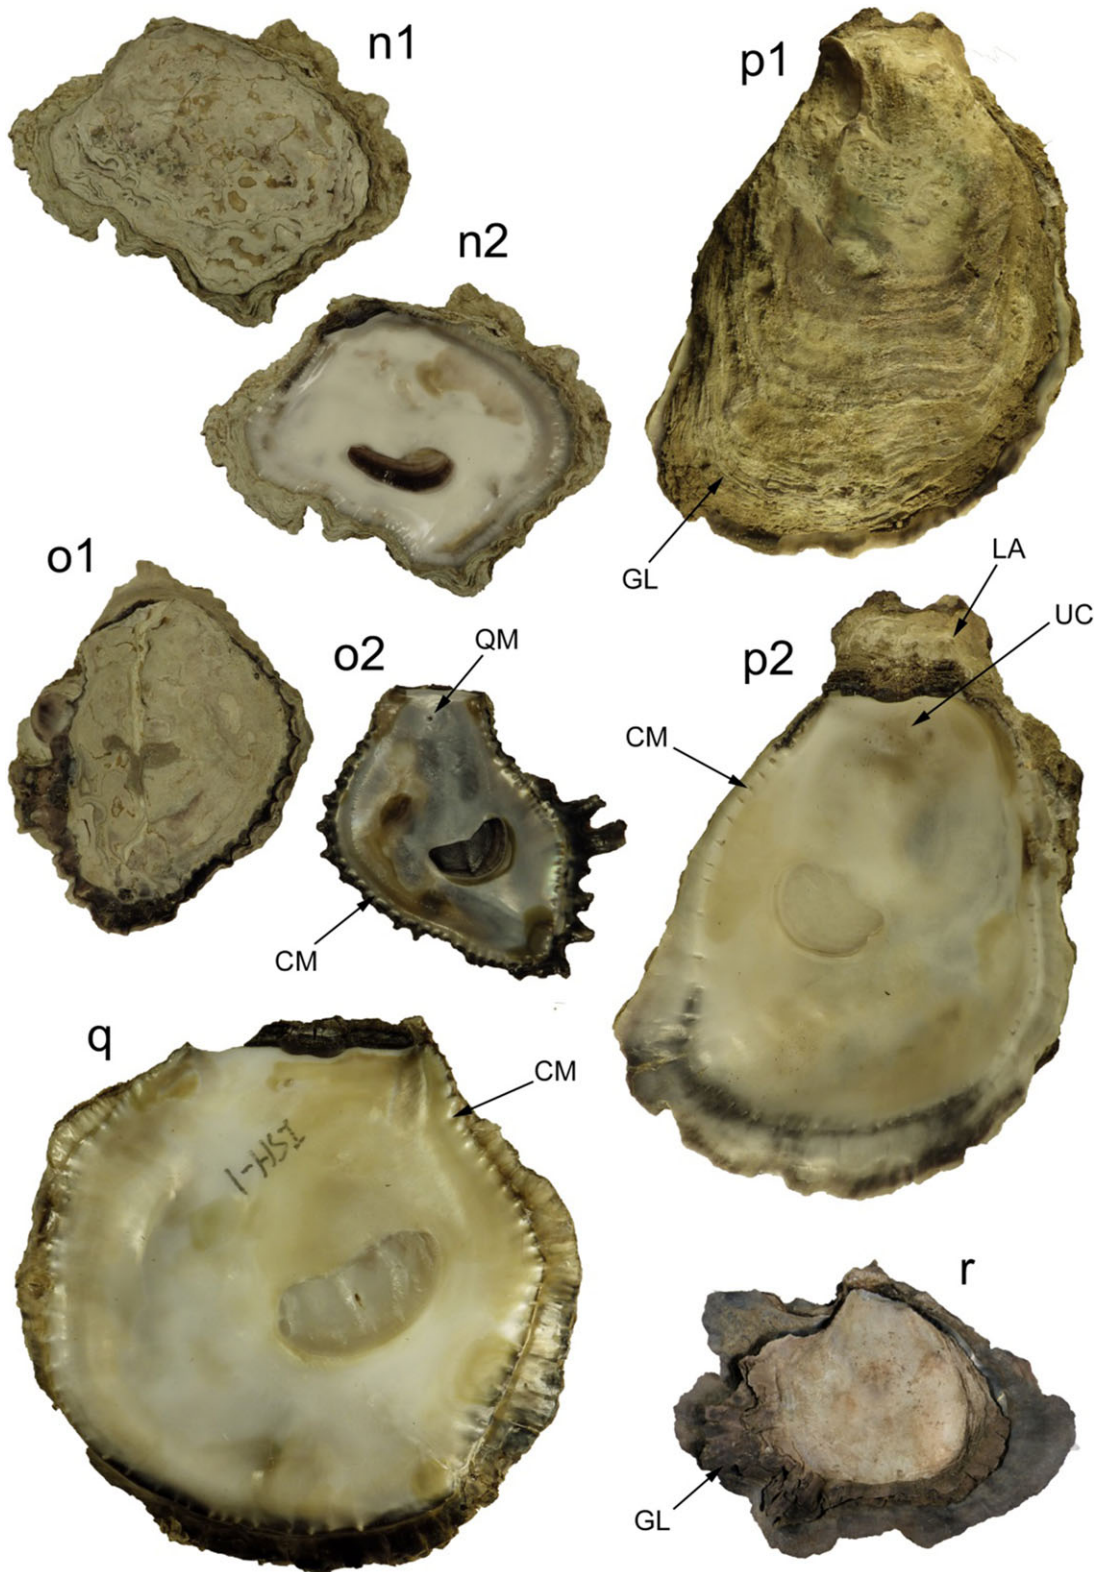

Figure 7. Continued

**Table 7.** Summary of geographical distribution and habitat of non-*mordax* lineages.

| Lineage                | Habitat <sup>†</sup> | Tidal zone    | Substrate             | Geographic distribution (references <sup>†</sup> )           | Climatic zone            |
|------------------------|----------------------|---------------|-----------------------|--------------------------------------------------------------|--------------------------|
| Lineage C              | RM, SB, MS           | Low to middle | Rock                  | Southern Honshu, Amami to Iriomote Islands (a–c)             | Temperate to subtropical |
| <i>S. kegaki</i>       | OB, OS               | Low to middle | Rock                  | Northern Honshu to Amami, Iriomote Island, South Korea (a–e) | Temperate to subtropical |
| Lineage F              | RM, SB, MS           | Low to middle | Rock, shell, mangrove | Southern Honshu to Southeast Asia (a–c)                      | Temperate to tropical    |
| Lineage G              | RM, SB, MS           | Low to middle | Rock                  | Ishigaki and Iriomote Islands, Taiwan (a–c)                  | Subtropical              |
| Lineage H              | RM, SB, MS           | Low to middle | Rock                  | Iriomote Island (a)                                          | Subtropical              |
| Lineage I              | MS                   | Middle        | Mangrove              | Ishigaki and Iriomote Islands (a,c)                          | Subtropical              |
| Lineage J <sup>‡</sup> | RM, SB, MS           | Low to middle | Rock                  | Ishigaki and Iriomote Islands, tropical IWP (a,c,f)          | Subtropical to tropical  |

<sup>†</sup>RM, river mouth; SB, sheltered bay; MS, mangrove swamp; OS, oceanic shore; OB, open bay.

<sup>†</sup>a, this study; b, Lam & Morton (2006); c, Hamaguchi et al. (2014); d, Inaba & Torigoe (2004); e, Min (2004); f, Huber (2010).

<sup>‡</sup>Inferred assuming that this lineage corresponds to *S. spathulata* (see text).

## DISCUSSION

### *Cryptic phylogenetic diversity*

Our analysis of mitochondrial genes allowed a robust separation of the studied non-*mordax* *Saccostrea* specimens into seven lineages, irrespective of the method of tree reconstruction. Almost all the lineage pairs exhibited more than 10% nucleotide difference (Table 5). For comparison, we estimated the divergence among *Crassostrea* species (analysing data from Sekino et al., 2015; four mitochondrial genes; K2P). The divergence among non-*mordax* lineages was comparable with the level of interspecific divergence in *Crassostrea* (e.g. 10% difference between *C. gigas* and *C. sikamea*, 15% between *C. gigas* and *C. hongkongensis*, 17% between *C. gigas* and *C. ariakensis* and 20% between *C. gigas* and *C. bilineata*). Even the minimum difference observed between non-*mordax* lineages (4% between H and *S. kegaki*) exceeded the 2% difference between *C. gigas* and *C. angulata*.

Among our seven non-*mordax* lineages, lineages H, I and J were not described by Lam & Morton (2006). Given the high site-specificity of molluscan fauna in the Japanese subtropical islands (Nawa, 2008), previous failures to find these lineages could be attributed simply to insufficient geographical coverage during sampling. However, our study areas were also limited, so the present study should be affected by the same problem. For example, unlike Lam & Morton (2006), we failed to identify lineage A at Okinawa Island, probably because we did not survey their sampling site (Itoman, southern Okinawa I.). Similarly, lineage 2 of *S. malabonensis* described by Hamaguchi et al. (2014) was not found in our specimens, whereas we found the new lineage H. Thus, the phylogenetic diversity of IWP *Saccostrea* oysters may still be underestimated and further study is required.

### *Geographical distribution of non-mordax lineages*

Among the observed lineages, lineage F was found over the widest geographical range, followed by lineage C and *S. kegaki* (Table 4). The frequent occurrence of lineage C and *S. kegaki* was in agreement with Lam & Morton (2006) and Hamaguchi et al. (2014), who showed that these lineages were limited to subtropical and temperate zones of the northern hemisphere. On the other hand, *S. glomerata*, which was not identified in the present study, is mainly distributed in temperate southeastern Australia (Lam & Morton, 2006). These results imply that climatic adaptation and geographic separation have contributed to the phylogenetic diversity of non-*mordax* oysters.

Lam & Morton (2006) showed that, among their study sites, the highest phylogenetic diversity was observed in Taiwan (with at least five non-*mordax* lineages). This is geographically close to Iriomote Island (Fig. 1), where we found the highest phylogenetic

diversity, with all seven lineages present (Table 4). This site is located at the lowest latitudinal position among the surveyed islands, agreeing with the suggestion that *Saccostrea* species are most diverse in low-latitudinal tropical zones (Harry, 1985). Furthermore, since Iriomote Island lies towards the northern limit of the tropical zone, the environment is still suitable for lineage C and *S. kegaki*, which apparently favour northern subtropical or temperate waters (Lam & Morton, 2006).

### *Nuclear DNA differences among non-mordax lineages*

Overall, the separation among the mitochondrial lineages was not supported well by the nuclear *ITS1* data. However, lineages G, I and J were distinct in the *ITS1* data (Figs. 4, 6), even in Iriomote Island where all seven lineages co-occurred. Although the small sample sizes should be taken into consideration, our results suggest that these lineages are reproductively isolated, thereby meriting the status of biological species (Mayr, 1963). Thus, we argue against the lumping of these ‘species’ as a ‘non-*mordax* superspecies’ (or ‘*S. cucullata* superspecies’ as by Lam & Morton, 2006).

By contrast, we failed to find consistent differences in *ITS1* among lineages C, F, H and *S. kegaki*. Neither fixed substitutions nor indels were observed among these lineages (Fig. 4), even in the removed segments (data not shown). The long insertion (Fig. 5) was common in two lineages (lineage F and *S. kegaki*). Our attempted phylogenetic tree reconstruction produced an unresolved pattern (Fig. 6A). The network analysis (Fig. 6B) revealed an uneven distribution of their *ITS1* types among these lineages, but some types were shared by different lineages. Moreover, it is likely that future surveys will find more shared *ITS1* types. If these lineages are reproductively isolated at present, then our results can be ascribed to incomplete lineage sorting after their reproductive isolation (e.g. Xiao et al., 2010), as a consequence of the larger effective population size of the nuclear than mitochondrial genomes. Another likely scenario is the occurrence of ongoing hybridization and subsequent introgression among the lineages.

However, it is also possible that our data from the short *ITS1* region underestimate the underlying phylogenetic divergence among lineages. Further sequencing of the entire *ITS* region (*ITS1* and *ITS2*) may provide a finer resolution of lineages (Nolan & Cribb, 2005); the *ITS2* region has proved useful for phylogenetic separation among Ostreidae oysters (Salvi et al., 2014). On the other hand, the presence of multiple ribosomal DNA arrays in the genome complicates *ITS*-based phylogenetic inference (reviewed by Álvarez & Wendel, 2003). Thus, multiple single-copy genes may be more suitable for future studies (e.g. Cronn et al., 2002). The draft genome of *C. gigas* (Zhang et al., 2012) offers the potential for discovery of such genes.

*Correspondence between species names and mitochondrial lineages*

The species assignment was unclear for some of the ref-seqs. For example, two ref-seqs of *S. echinata* belonged to different clades (lineage A/B or lineage J). The ref-seq of *S. malabonensis* was grouped with lineage F. However, Hamaguchi *et al.* (2014) concluded that this ref-seq was misidentified and instead they assigned the name *S. malabonensis* (based on their lineage 1 of *S. malabonensis*) to a clade corresponding to lineage J (Fig. 2). In addition, lineage I included *S. mytiloides* determined by Hamaguchi *et al.* (2014) (see below for the validity of this species name). However, we could not verify these species assignments, because photographs of their *S. mytiloides* and *S. malabonensis* specimens are not available. In any case, the highly variable shells even within lineages make it difficult to define lineage-specific morphological traits. Thus, it was not possible to definitely associate most of the non-*mordax* lineages with a nominal species (see Table 2 for nominal species and authorities). We present below our inferences of the species name for each lineage.

*Saccostrea kegaki* (Fig. 7: k–m): the well-developed hyote spines allowed relatively easy separation of this lineage from the others. With this conspicuous trait, *S. kegaki* should be assigned to this lineage, in agreement with Lam & Morton (2006). However, our nuclear data failed to support the genetic integrity of *S. kegaki*. In Japan, *S. kegaki* can be found in temperate and subtropical zones, from northern Honshu (Inaba & Torigoe, 2004) to Iriomote Island, but is scarcer at lower latitudes.

Non-*mordax* lineage F (Fig. 7: c–g): this is one of the most common lineages, with a wide geographical distribution from temperate southern Japan to tropical Southeast Asia (present study; Lam & Morton, 2006; Hamaguchi *et al.*, 2014). SH was variable but generally small (as little as 22–28 mm in Shikoku). The left valve was sometimes cupped with a narrow attachment area (Fig. 7: e2, g) and attachment was sometimes to shells of *Batillaria* (Fig. 7: f, g). According to the original species description of *S. malabonensis*, it is a small oyster (SH 25–45 mm) with cupped left valve and thick ribs and attaches to substrates, including other shells, with narrow attachment area (Faustino, 1932). We therefore consider that *S. malabonensis* may correspond to lineage F, although Hamaguchi *et al.* (2014) assigned *S. malabonensis* to lineage J (see below). The shell shapes of *S. malabonensis sensu* Torigoe (1981), Inaba & Torigoe (2004) and Huber (2010), i.e. with a wide attachment area and narrow, planar shells, do not conform to the original species description. Lineage F also resembled one of the syntypes of *S. circumscuta* (Inaba & Torigoe, 2004: pl. 4, fig.1); however, the type locality of that species is Fiji and Samoa, whereas lineage F has never reported from the South Pacific (Lam & Morton, 2006).

Non-*mordax* lineage H (Fig. 7: h–j): our smaller specimens of lineage H occasionally had hyote spines. Interestingly, this lineage and *S. kegaki*, which was characterized by distinctive hyote spines, were phylogenetically close (Figs. 2, 3). *Saccostrea echinata* is also characterized by the occurrence of hyote spines (Quoy & Gaimard, 1835). Since hyote spines are present in some juveniles of non-*mordax* lineages A and B, Lam & Morton (2006) proposed that *S. echinata* was a juvenile form or ecotype of '*S. cucullata*' (i.e. non-*mordax* lineage A or B). On the other hand, *S. echinata* with hyote spines has been reported from Ishigaki Island, which neighbours Iriomote Island (Fig. 1) (Torigoe, 1981; Inaba & Torigoe, 2004). As non-*mordax* lineages A and B appear not to be major lineages in the subtropical islands of Japan (present study; Hamaguchi *et al.*, 2014), we consider that *S. echinata* could also correspond to lineage H. It seems that the *S. echinata sensu* Torigoe (1981) and Inaba & Torigoe (2004) included lineages A, B or H (with hyote spines) and another large oyster, *S. spathulata* (lineage J; see below).

Non-*mordax* lineage J (Fig. 7: p–q): it is appropriate to assign *S. spathulata* to this lineage, because of its large size (SH 90–123 mm in our specimens), wide commissural shelf and the

presence of violet squamae or lamellae on the outer right valve. This nominal species has long been neglected, but Huber (2010) regarded it as valid. Hamaguchi *et al.* (2014) applied *S. malabonensis* to lineage J, but the shell features of our specimens did not agree with its original description.

For each of the lineages C, G and I, our data were not sufficient to infer a likely species name. Lineage C (Fig. 7: a–b) resembled lineage F, but typically had conspicuous disjunct pallial lines. It is distributed mainly in the subtropical zone, although Hamaguchi *et al.* (2014) reported it from central Honshu. The specimens of lineage I (Fig. 7: r) were attached to mangrove trees and had distinctive shells with an extended margin of the left valve, as if mimicking tree bark. Our review of the original species descriptions of the nominal species (Table 2) failed to find a species with a similar shell. Hamaguchi *et al.* (2014) claimed that lineage I corresponds to *S. mytiloides*; however, if this '*S. mytiloides*' refers to *S. mytiloides* (Lamarck, 1819), then the name is invalid, because *Ostrea mytiloides* Lamarck, 1819 is a homonym of *O. mytiloides* Hermann, 1781 and *O. mytiloides* Gmelin, 1791. We also note that Inaba & Torigoe (2004) and Huber (2010) synonymized *O. mytiloides* Lamarck, 1819 with *S. echinata* (Table 2).

*Concluding remarks*

We reaffirm the extreme difficulty of species diagnosis in *Saccostrea* species of the non-*mordax* group. In our specimens, only *S. kegaki* and lineage J had diagnostic shell features, thereby allowing us to associate them with proposed species names. Further attempts at species assignment based on DNA evidence and shell morphology in non-*mordax* oysters, or *Saccostrea* species generally, will be error-prone in most cases, even with reference to the original species descriptions and type specimens.

Because shells are of limited use as a taxonomic guide, the genus *Saccostrea* should be reorganized by laying more weight on DNA evidence; the parallel analyses of mitochondrial and nuclear DNA are prerequisite for adequate definition of these species.

## SUPPLEMENTARY MATERIAL

Supplementary material is available at *Journal of Molluscan Studies* online.

## ACKNOWLEDGEMENTS

We are indebted to our colleagues who helped us in collecting oyster samples: Drs Shigeyuki Baba and Mio Kezuka (International Society for Mangrove Ecosystems), Drs Yoichi Yusa and Noriko Yasuoka (Nara Woman's University), Mr Hiroshi Ishikawa (Ehime Prefecture) and Drs Motoshige Yasuie and Miyuki Mekuchi (National Research Institute of Fisheries Science). We also thank Dr So Ishida, the Osaka Museum of Natural History (OMNH), for his help to deposit voucher specimens in OMNH. The manuscript was improved by many insightful comments from two anonymous reviewers and Editor D.G. Reid.

This study was partly supported by research funds from Japan Fisheries Research and Education Agency (No. 5BA101).

## REFERENCES

- ÁLVAREZ, I. & WENDEL, J.F. 2003. Ribosomal ITS sequences and plant phylogenetic inference. *Molecular Phylogenetics and Evolution*, **29**: 417–434.
- ANDERSON, T.J. & ADLARD, R.D. 1994. Nucleotide sequence of rDNA internal transcribed spacer supports synonymy of *Saccostrea commercialis* and *S. glomerata*. *Journal of Molluscan Studies*, **60**: 196–197.
- ARKHIPKIN, A., BOUCHER, E., GRAS, M. & BRICKLE, P. 2014. Variability in age and growth of common rock oyster *Saccostrea cucullata*

- (Bivalvia) in Ascension Island (central-east Atlantic). *Journal of the Marine Biological Association of the United Kingdom*. Available on CJO2014. doi:10.1017/S0025315414001982.
- BANDELT, H.J., FORSTER, P. & RÖHL, A. 1999. Median-joining networks for inferring intraspecific phylogenies. *Molecular Biology and Evolution*, **16**: 37–48.
- BORN, I. 1778. *Index rerum naturalium Musei Caesarei Vindobonensis*. Part 1. Testacea. Officina Krausiana, Vienna.
- BORN, I. 1780. *Testacea Musei Caesarei Vindobonensis, quae jussu Mariae Theresiae Augustae disposuit et descripsit*. Gerold for Johann P. Kraus, Vienna.
- CARPENTER, P.P. 1857. *Catalogue of the collection of Mazatlan shells in the British Museum*. Department of Zoology, British Museum (Natural History), London.
- CARTER, J.G., ALTABA, C.R., ANDERSON, L.C., ARAUJO, R., BIAKOV, A.S., BOGAN, A.E., CAMPBELL, D.C., CAMPBELL, M., JIN-HUA, C., COPE, J.C.W., DELVENE, G., DIJKSTRA, H. H., ZONG-JIE, F., GADNER, R.N., GAVRILOVA, V.A., GONCHAROVA, I.A., HARRIES, P.J., HARTMAN, J.H., HAUTMANN, M., HOEH, W.R., HYLLEBERG, J., BAO-YU, J., JOHNSTON, P., KIRKENDALE, L., KLEEMAN, K., HOPPKA, J., KRIZ, J., MACHADO, D., MALCHUS, N., MARQUEZ-ALIAGA, A., MASSE, J.-P., MCROBERTS, C.A., MIDDELFART, P.U., MITCHELL, S., NEVESSKAJA, L.A., OZER, S., POJETA, J., JOHN, POLLUBOTKO, I.V., PONS, J.M., POPOV, S., SANCHEZ, T., SARTORI, A.F., SCOTT, R.W., SEY, I.I., SIGNORELLI, J.H., SILANTIEV, V.V., SKELTON, P.W., THOMAS, S., WATERHOUSE, J.B., WINGARD, G.L. & YANCEY, T. 2011. A synoptical classification of the Bivalvia (Mollusca). *Paleontological Contributions*, **4**: 1–47.
- CASTRESANA, J. 2000. Selection of conserved blocks from multiple alignments for their use in phylogenetic analysis. *Molecular Biology and Evolution*, **17**: 540–552.
- CRONN, R.C., SMALL, R.L., HASELKORN, T. & WENDEL, J.F. 2002. Rapid diversification of the cotton genus (*Gossypium*: Malvaceae) revealed by analysis of sixteen nuclear and chloroplast genes. *American Journal of Botany*, **89**: 707–725.
- DALL, W.H. 1914. Notes on west American oysters. *Nautilus*, **28**: 1–3.
- DARRIBA, D., TABOADA, G.L., DOALLO, R. & POSADA, D. 2012. jModelTest 2: more models, new heuristics and parallel computing. *Nature Methods*, **9**: 772.
- DON, R.H., COX, P.T., WAINWRIGHT, B.J., BAKER, K. & MATTICK, J.S. 1991. 'Touchdown' PCR to circumvent spurious priming during gene amplification. *Nucleic Acids Research*, **19**: 4008.
- FAUSTINO, L.A. 1932. Recent and fossil shells from the Philippine Islands. *Philippine Journal of Science*, **49**: 543–551.
- FOLMER, O., BLACK, M., HOEH, W., LUTZ, R. & VRJENHOEK, R. 1994. DNA primers for amplification of mitochondrial cytochrome *c* oxidase subunit I from diverse metazoan invertebrate. *Molecular Marine Biology and Biotechnology*, **3**: 294–299.
- GMELIN, J.F. 1791. *Caroli a Linné, Systema naturae per regna tria naturae*. Edn 13. Vol. I (Vermes). G.E. Beer, Leipzig.
- GOULD, A.A. 1850. Descriptions of shells from the United States Exploring Expedition. *Boston Society of Natural History Proceedings*, **3**: 343–348.
- GRAY, J.E. 1825. A list of description of some species of shells not taken notice of by Lamarck. *Annals of Philosophy, New Series*, **9**: 134–140.
- HAMAGUCHI, M., SHIMABUKURO, H., USUKI, H. & HORI, M. 2014. Occurrences of the Indo-West Pacific rock oyster *Saccostrea cucullata* in mainland Japan. *Marine Biodiversity Records*, **7**: e84.
- HARRY, H.W. 1985. Synopsis of the supraspecific classification of living oysters (Bivalvia: Gryphaeidae and Ostreidae). *Veliger*, **28**: 121–158.
- HASEGAWA, M., KISHINO, K. & YANO, T. 1985. Dating the human-ape splitting by a molecular clock of mitochondrial DNA. *Journal of Molecular Evolution*, **22**: 160–174.
- HEBERT, P.D.N., CYWINSKA, A., BALL, S.L. & DEWAARD, J.R. 2003. Biological identifications through DNA barcodes. *Proceedings of the Royal Society of London. Series B, Biological Sciences*, **270**: 313–321.
- HUBER, M. 2010. *Compendium of bivalves*. ConchBooks, Hackenheim.
- INABA, A. & TORIGOE, K. 2004. Oysters in the world, part 2: systematic description of the recent oysters. *Bulletin of the Nishinomiya Shell Museum*, **3**: 1–63.
- IREDALE, T. 1924. Result from Roy Bell's molluscan collections. *Proceedings of the Linnean Society of New South Wales*, **49**: 179–278.
- IREDALE, T. & ROUGHLEY, T.C. 1933. The scientific name of the commercial oyster of New South Wales. *Proceedings of the Linnean Society of New South Wales*, **58**: 278.
- KATOH, K. & STANDLEY, D.M. 2013. MAFFT multiple sequence alignment software version 7: improvements in performance and usability. *Molecular Biology and Evolution*, **30**: 772–780.
- KIMURA, M. 1980. A simple method for estimating evolutionary rate of base substitutions through comparative studies of nucleotide sequences. *Journal of Molecular Evolution*, **16**: 111–220.
- LAM, K. & MORTON, B. 2004. The oysters of Hong Kong (Bivalvia: Ostreidae and Gryphaeidae). *Raffles Bulletin of Zoology*, **52**: 11–28.
- LAM, K. & MORTON, B. 2006. Morphological and mitochondrial DNA analysis of the Indo-West Pacific rock oysters (Ostreidae: Saccostrea species). *Journal of Molluscan Studies*, **72**: 235–245.
- LAMARCK, J.B.P.A. 1819. *Histoire naturelle des animaux sans vertèbres*. Vol. 6. Chez l'auteur, Paris.
- LAMY, E. 1930. Révision des *Ostrea* vivants du Museum National d'Histoire Naturelle de Paris. *Journal de Conchyliologie*, **73**: 233–275.
- LIBRADO, P. & ROZAS, J. 2009. DnaSP v5: a software for comprehensive analysis of DNA polymorphism data. *Bioinformatics*, **25**: 1451–1452.
- LIU, J., LI, Q., KONG, L., YU, H. & ZHENG, X. 2011. Identifying the true oysters (Bivalvia: Ostreidae) with mitochondrial phylogeny and distance-based DNA barcoding. *Molecular Ecology Resources*, **11**: 820–830.
- MAYR, E. 1963. *Animal species and evolution*. Harvard University Press, Cambridge, MA.
- MILBURY, C.A. & GAFFNEY, P.M. 2005. Complete mitochondrial DNA sequence of the Eastern oyster *Crassostrea virginica*. *Marine Biotechnology*, **7**: 697–712.
- MIN, D. 2004. *Molluscs in Korea*. Min Molluscan Research Institute, Seoul.
- NAWA, J. 2008. Molluscan fauna of tidal flats in the Ryukyu Islands, part 2: Okinawa, Miyako and Yaeyama Islands. *Bulletin of the Nishinomiya Shell Museum*, **5**: 1–81.
- NEI, M. 1987. *Molecular evolutionary genetics*. Columbia University Press, New York.
- NEI, M. & KUMAR, S. 2000. *Molecular evolution and phylogenetics*. Oxford University Press, New York.
- NOLAN, M.J. & CRIBB, T.H. 2005. The use and implications of ribosomal DNA sequencing for the discrimination of Digenean species. *Advances in Parasitology*, **60**: 101–163.
- PERON, F. & LESUEUR, C.A. 1807. Terre d'Endracht. In: *Voyage de découvertes aux terres australes: exécuté par ordre de Sa Majesté l'Empereur et Roi, sur les corvettes le Géographe, le Naturaliste, et la goëlette le Casuarina, pendant les années 1800, 1801, 1802, 1803 et 1804*. Vol. 1, Historique (F. Peron & L.C.D. Freycinet, eds), L'Imprimerie Impériale, Paris.
- QUOY, J.R.T. & GAIMARD, P. 1835. *Voyage de la corvette l'Astrolabe exécuté par ordre du Roi, pendant les années 1826-1827-1828-1829 sous le commandement de M. J. Dumont d'Urville, Zoologie*, Vol. 3. J. Tastu, Paris.
- RAITH, M., ZACHERL, D.C., PILGRIM, E.M. & EERNISSE, D.J. 2015. Phylogeny and species diversity of Gulf of California oysters (Ostreidae) inferred from mitochondrial DNA. *American Malacological Bulletin*, **33**: 1–21.
- REECE, K.S., CORDES, J.F., STUBBS, J.B., HUDSON, K.L. & FRANCIS, E.A. 2008. Molecular phylogenies help resolve taxonomic confusion with Asian *Crassostrea* oyster species. *Marine Biology*, **153**: 709–721.
- RONQUIST, F., TESLENKO, M., VAN DER MARK, P., AYRES, D. L., DARLING, A., HÖHNA, S., LARGET, B., LIU, L., SUCHARD, M.A. & HUELSENBECK, J.P. 2012. MrBayes 3.2: efficient Bayesian phylogenetic inference and model choice across a large model space. *Systematic Biology*, **61**: 539–542.
- SAITOU, N. & NEI, M. 1987. The neighbor-joining method: a new method for reconstructing phylogenetic trees. *Molecular Biology and Evolution*, **4**: 406–425.
- SALVI, D., MACALI, A. & MARIOTTINI, P. 2014. Molecular phylogenetics and systematics of the bivalve family Ostreidae based on rRNA

- sequence-structure models and multilocus species tree. *PLoS One* **9**: e108696.
- SCHWARZ, G. 1978. Estimating the dimension of a model. *Annals of Statistics*, **6**: 461–464.
- SEKINO, M., ISHIKAWA, H., FUJIWARA, A., DOYOLA-SOLIS, E.F. C., LEBATA-RAMOS, M.J.H. & YAMASHITA, H. 2015. The first record of a cupped oyster species *Crassostrea dianbaiensis* in the waters of Japan. *Fisheries Science*, **81**: 267–281.
- SEKINO, M., SATO, S., HONG, J.S. & LI, Q. 2012. Contrasting pattern of mitochondrial population diversity between an estuarine bivalve, the Kumamoto oyster *Crassostrea sikamea*, and the closely related Pacific oyster *C. gigas*. *Marine Biology*, **159**: 2757–2776.
- SEKINO, M. & YAMASHITA, H. 2013. Mitochondrial DNA barcoding for Okinawan oysters: a cryptic population of the Portuguese oyster *Crassostrea angulata* in Japanese waters. *Fisheries Science*, **79**: 61–76.
- SOWERBY, G.B. II. 1871. Monograph of the genus *Ostrea*. In: *Conchologia iconica*. Vol. 18 (L.A. Reeve, ed.). L. Reeve & Co., London.
- STENZEL, H.B. 1971. Oysters. In: *Treatise on invertebrate paleontology, Part N, Mollusca* vol. 3, Bivalvia 6 (MOORE R.C., ed.), pp. N953–N1224, Geological Society of America, Boulder, CO.
- TAMURA, K., STECHER, G., PETERSON, D., FILIPSKI, A. & KUMAR, S. 2013. MEGA6: Molecular Evolutionary Genetics Analysis v6.0. *Molecular Biology and Evolution*, **30**: 2725–2729.
- TORIGOE, K. 1981. Oysters in Japan. *Journal of Science of the Hiroshima University. Series B, Division 1, Zoology*, **29**: 291–481.
- TORIGOE, K. & INABA, A. 1981. On the scientific name of Japanese spiny oyster “Kegaki”. *Venus*, **40**: 126–134.
- UNTERGRASSER, A., CUTCUTACHE, I., KORESSAAR, T., YE, J., FAIRCLOTH, B.C., REMM, M. & ROZEN, S.G. 2012. Primer3—new capabilities and interfaces. *Nucleic Acids Research*, **40**: e115.
- XIAO, L.Q., MÖLLER, M. & ZHU, H. 2010. High nrDNA ITS polymorphism in the ancient extant seed plant *Cycas*: incomplete concerted evolution and the origin of pseudogenes. *Molecular Phylogenetics and Evolution*, **55**: 168–177.
- ZHANG, G., FANG, X., GUO, X., LI, L., LUO, R., XU, F., YANG, P., ZHANG, L., WANG, X., QI, H., XIONG, Z., QUE, H., XIE, Y., HOLLAND, P.W.H., PAPS, J., ZHU, Y., WU, F., CHEN, Y., WANG, J., PENG, C., MENG, J., YANG, L., LIU, J., WEN, B., ZHANG, N., HUANG, Z., ZHU, Q., FENG, Y., MOUNT, A., HEDGECOCK, D., XU, Z., LIU, Y., DOMAZET-LOŠO, DU, Y., SUN, X., ZHANG, S., LIU, B., CHENG, P., JIANG, X., LI, J., FAN, D., WANG, W., FU, W., WANG, T., WANG, B., ZHANG, J., PENG, Z., LI, Y., LI, N., WANG, J., CHEN, M., HE, Y., TAN, F., SONG, X., ZHENG, Q., HUANG, R., YANG, H., DU, X., CHEN, L., YANG, M., GAFFNEY, P.M., WANG, S., LUO, L., SHE, Z., MING, Y., HUANG, W., ZHANG, S., HUANG, B., ZHANG, Y., QU, T., NI, P., MIAO, G., WANG, J., WANG, Q., STEINBERG, C.E.W., WANG, H., LI, N., QIAN, L., ZHANG, G., LI, Y., YANG, H., LIU, X., WANG, J., YIN, Y. & WANG, J. 2012. The oyster genome reveals stress adaptation and complexity of shell formation. *Nature*, **490**: 49–54.
